# Supplementary material for: Copper(II)-binding equilibria in human blood
Source: PubMed Central journal article supplement (PMC7105473; doi:10.1038/s41598-020-62560-4), 2020-03-30
Supplement: 41598_2020_62560_MOESM1_ESM.pdf [file 41598_2020_62560_MOESM1_ESM.pdf]

Supplementary Information for

## Copper(II)-binding equilibria in human blood

Tiina Kirsipuu, Anna Zadorožnaja, Julia Smirnova, Merlin Friedemann, Thomas Plitz, Vello Tõugu, Peep Palumaa

**This file includes:**

Figures S1, S2 & S3

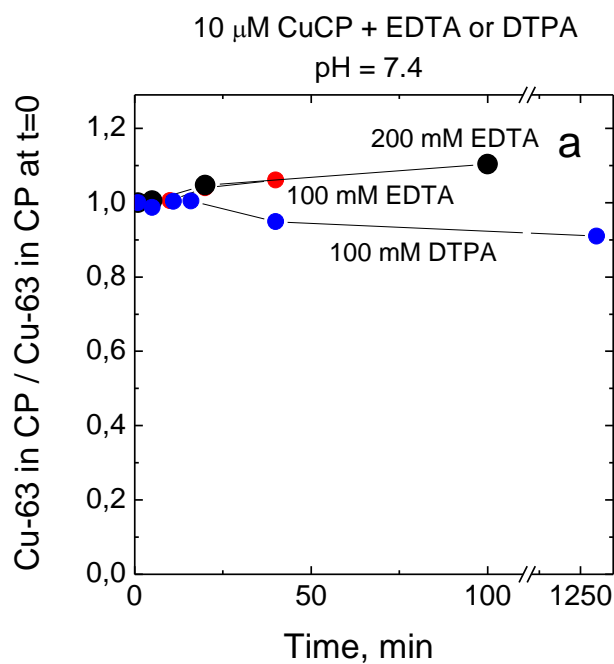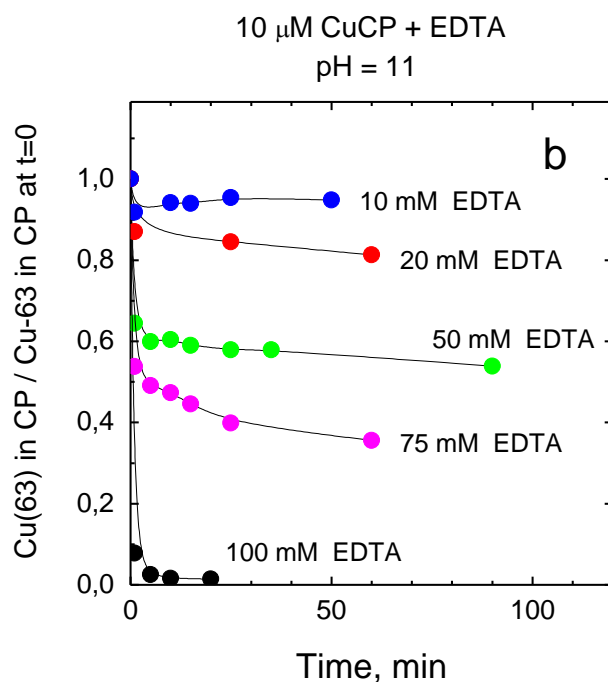

**Figure S1.** Effect of EDTA and DTPA on metal content in Cu•CP. Relative content of Cu-63 in CP in time in the presence of EDTA and DTPA at pH 7.4 (a) and at pH 11 (b). Conditions: 10  $\mu$ M Cu•CP, 100 - 200 mM EDTA and 200 mM DTPA; incubation buffer 50 mM HEPES, 50 mM NaCl, pH 7.4; (A); 10  $\mu$ M Cu•CP, 10 - 100 mM EDTA; incubation buffer 50 mM HEPES, 50 mM NaCl, pH 11; LC-ICP MS: column - 1 ml Sephadex G25 Superfine; elution buffer 200 mM  $\text{NH}_4\text{NO}_3$ , pH 7.4; flow rate 0.4 ml/min; injection volume 10  $\mu$ l, Cu-63 was monitored by ICP MS. Figure was created by program Origin 9 Pro (<https://www.originlab.com/>).

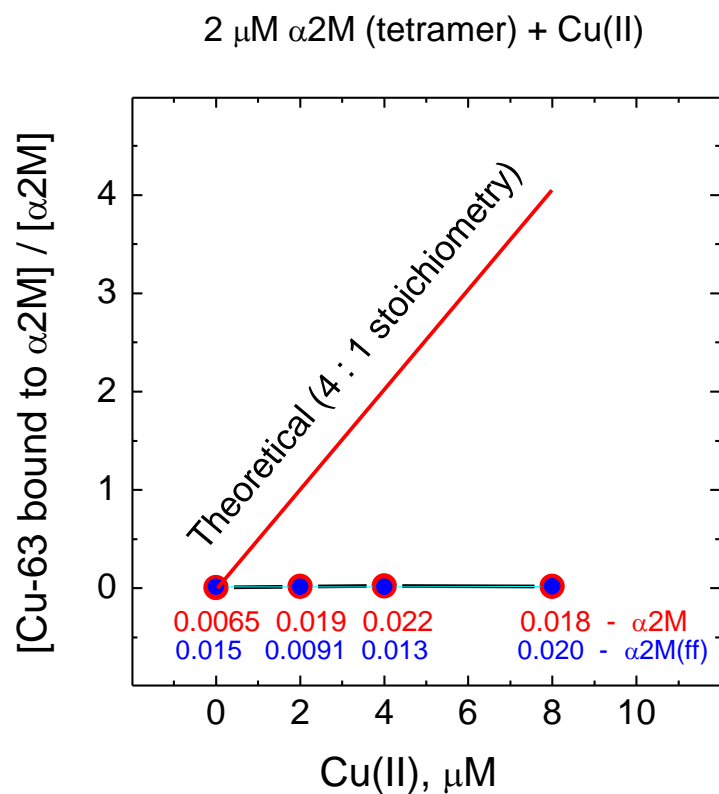

**Figure S2.** Binding of Cu(II) ions to  $\alpha\text{2M}$ . Red line – theoretical 4 : 1 binding of Cu(II) to tetrameric  $\alpha\text{2M}$ , blue line - practical binding of Cu(II) by “normal” (red circles) and “fast form” (blue circles) of  $\alpha\text{2M}$ . Conditions: 2  $\mu\text{M}$   $\alpha\text{2M}$ , 0 – 8  $\mu\text{M}$  Cu(II); incubation buffer 50 mM Hepes, 50 mM NaCl, pH 7.4; LC-ICP MS: column - 1 ml Sephadex G25 Superfine; elution buffer 200 mM  $\text{NH}_4\text{NO}_3$ , pH 7.4; flow rate 0.4 ml/min; injection volume 10  $\mu\text{l}$ , Cu-63 was monitored by ICP MS. Figure was created by program Origin 9 Pro (<https://www.originlab.com/>).

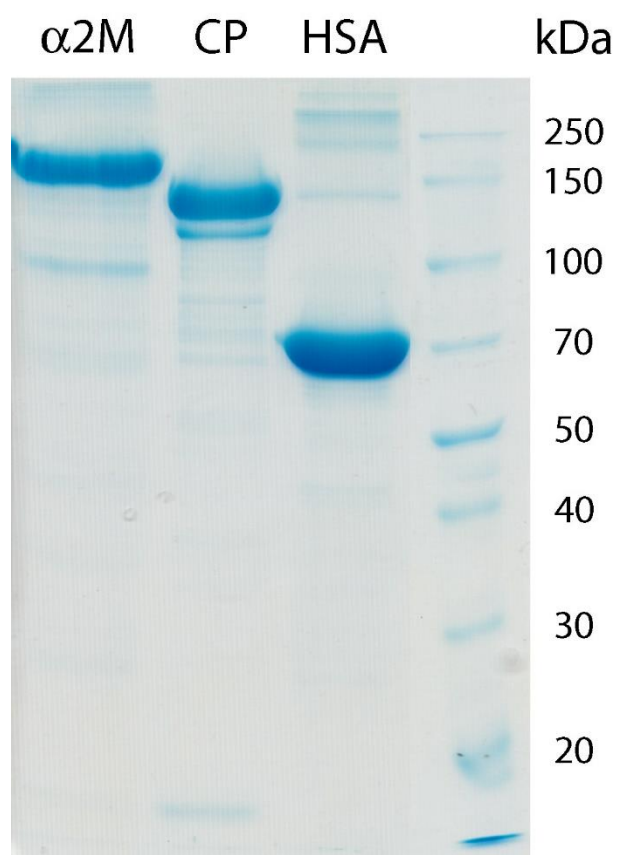

**Figure S3.** SDS PAGE of commercial HSA, CP and  $\alpha$ 2M samples with Laemmli gel (10%T/5%C). Protein samples were prepared in milliQ water at concentration of 3 mg/ml. Samples (20  $\mu$ l) were mixed with 5  $\mu$ l of 5x loading buffer (0.3M Tris-HCl pH=6.8, 25%  $\beta$ -mercaptoethanol, 50% glycerol, 10% SDS, 1% bromophenol blue), heated to 95°C for 5 min, and 15  $\mu$ l of samples were applied to the gel together with 5 $\mu$ l of “Thermo Scientific PageRuler Unstained Broad Range Protein Ladder”. Electrophoresis was performed with 25mM Tris, 192 mM Glycine, 0,1% SDS running buffer for about 1 h (130 V). The gel was stained in Coomassie staining solution for overnight followed by destaining in milliQ.
